# Supplementary figures and images for: Adoptive T Cell Therapy Is Complemented by Oncolytic Virotherapy with Fusogenic VSV-NDV in Combination Treatment of Murine Melanoma
Source: MDPI journal article supplement (doi:10.3390/cancers13051044), 2021-03-02

**Sup. Fig. 5**

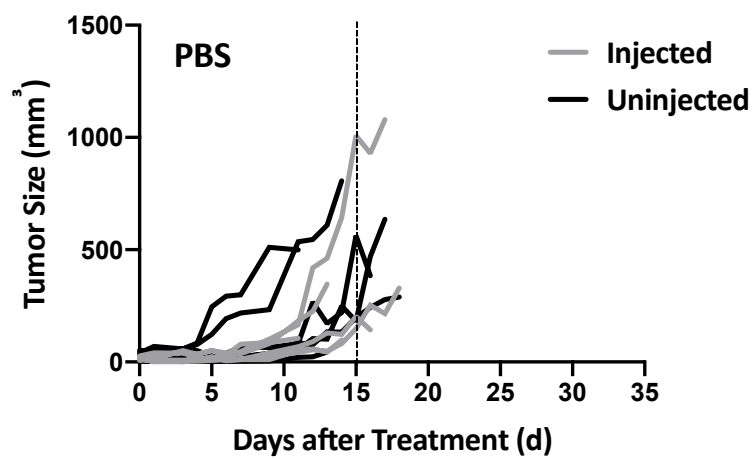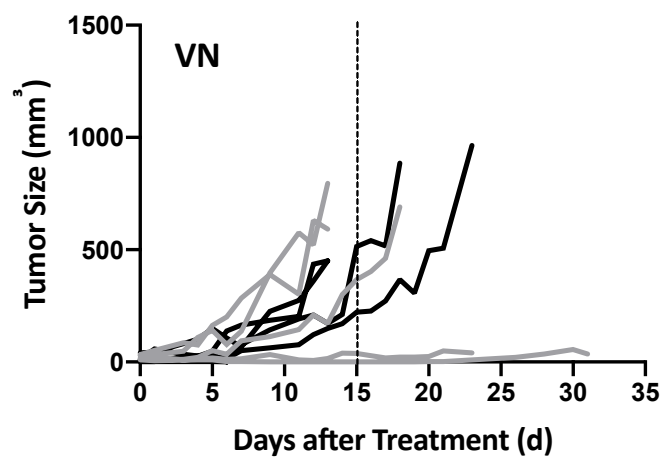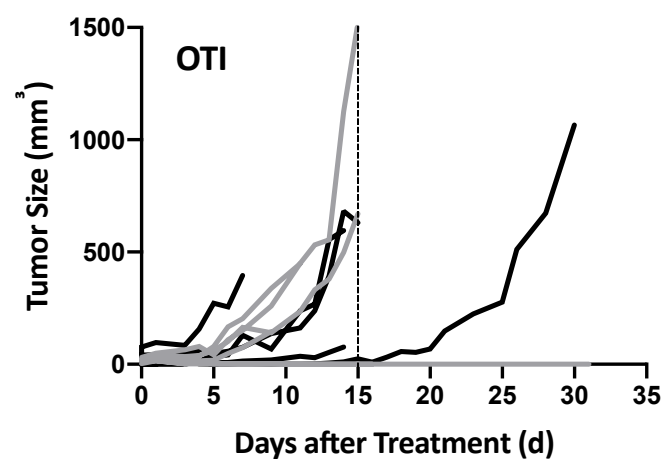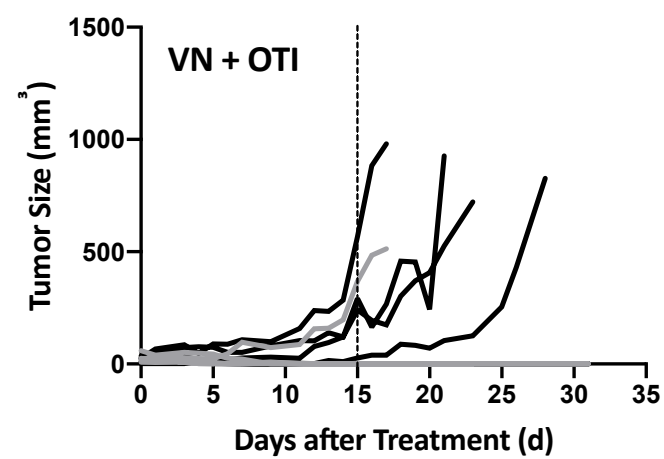

Supplement: s1 [file s1]

Sup. Fig. 2

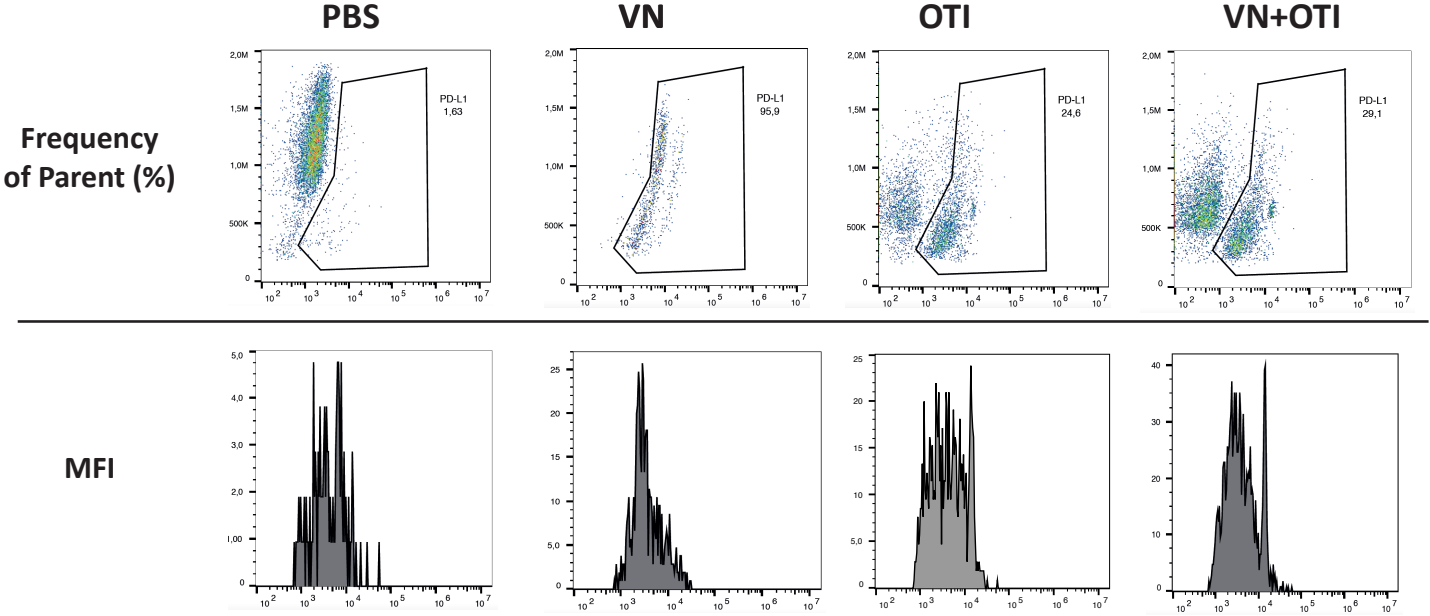

Supplement: s1 [file s1]

Sup. Fig. 1

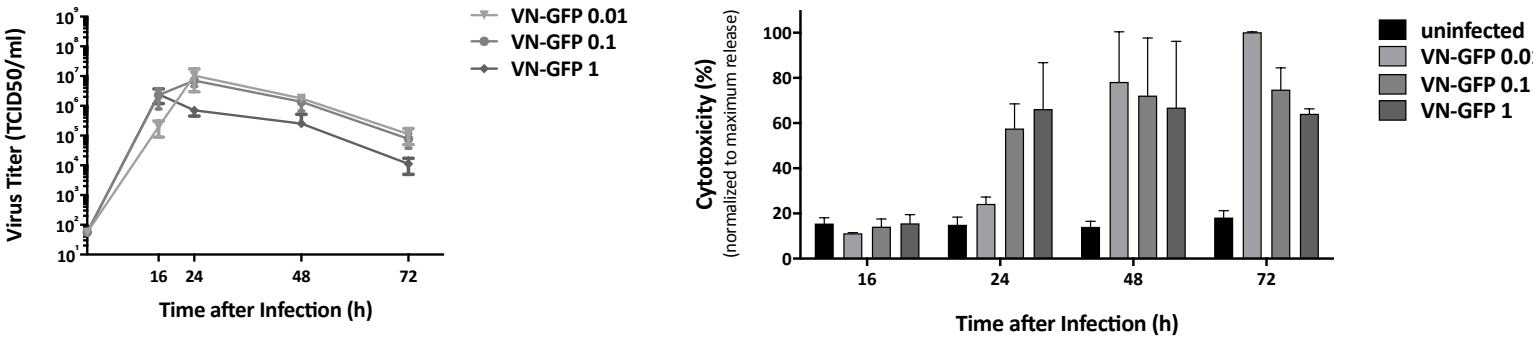

Supplement: s1 [file s1]

# Sup. Fig. 3

Tumor Implantation  
B16-OVA (s.c.), both flanks  
7 days prior

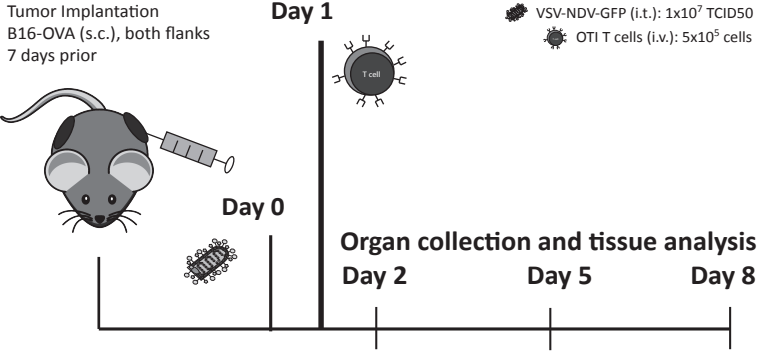

Supplement: s1 [file s1]

Sup. Fig. 4

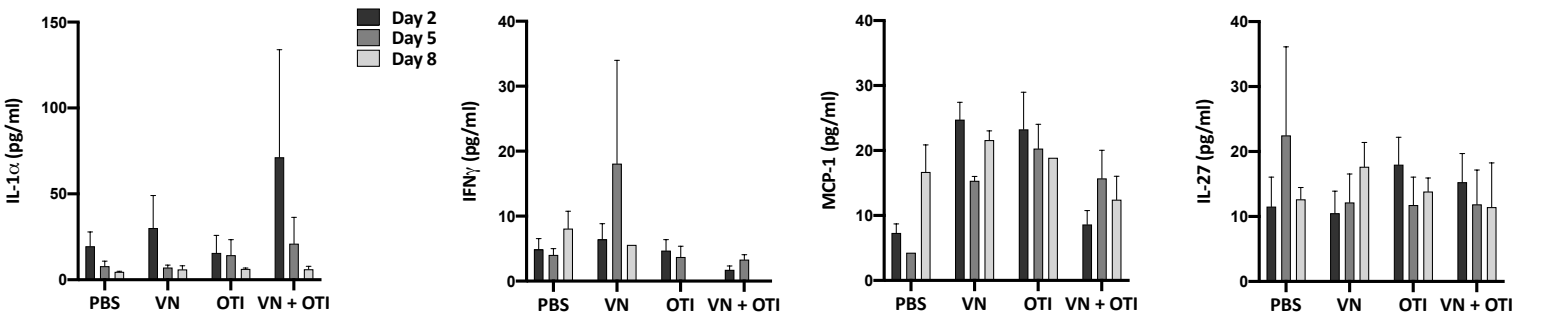

Supplement: s1 [file s1]
